# Supplementary material for: Liquid metal capsules for autonomic thermal energy control
Source: Royal Society of Chemistry journal article supplement (doi:10.1039/d6ra02315k), 2026-05-19
Supplement: d6ra02315k1.pdf [file d6ra02315k1.pdf]

# Liquid metal capsules for autonomic thermal energy control

## Supplementary Information

Bo Yu,<sup>ab2</sup> Hongqiang Wang,<sup>c</sup> Elena M. Shchukina,<sup>a</sup> Mikhail Zheludkevich,<sup>d</sup> Mathew Quarrell,<sup>a</sup> Bernard P. Binks,<sup>e</sup> Dmitry G. Shchukin<sup>a,\*</sup>

<sup>a</sup>Stephenson Institute for Renewable Energy, University of Liverpool, Liverpool L69 7ZF. UK.

<sup>b</sup>Lanzhou Institute of Chemical Physics, Lanzhou 730000, P. R. China.

<sup>c</sup>School of Materials Science and Engineering, Northwestern Polytechnical University, Xi'an 710072, P. R. China.

<sup>d</sup> Helmholtz-Zentrum Hereon, Institute of Surface Science, Max-Planck-Straße 1, 21502 Geesthacht, Germany

<sup>e</sup>Department of Chemistry, University of Hull, Hull HU6 7RX. UK.

\*Corresponding author: [d.shchukin@liverpool.ac.uk](mailto:d.shchukin@liverpool.ac.uk)

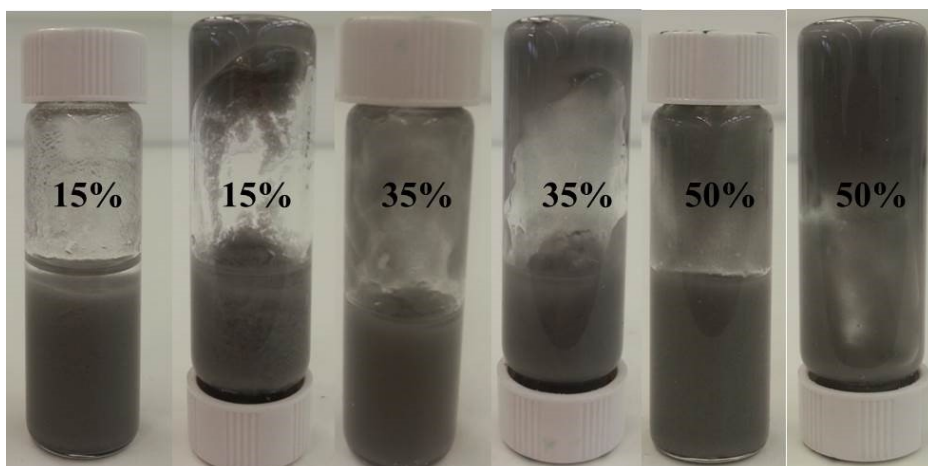

**Figure S1.** Photos of freshly prepared eutectic capsules in cyclohexane containing 20 mg/mL GaIn and 30 mg/mL silica nanoparticles with different %SiOH content on silica nanoparticles.

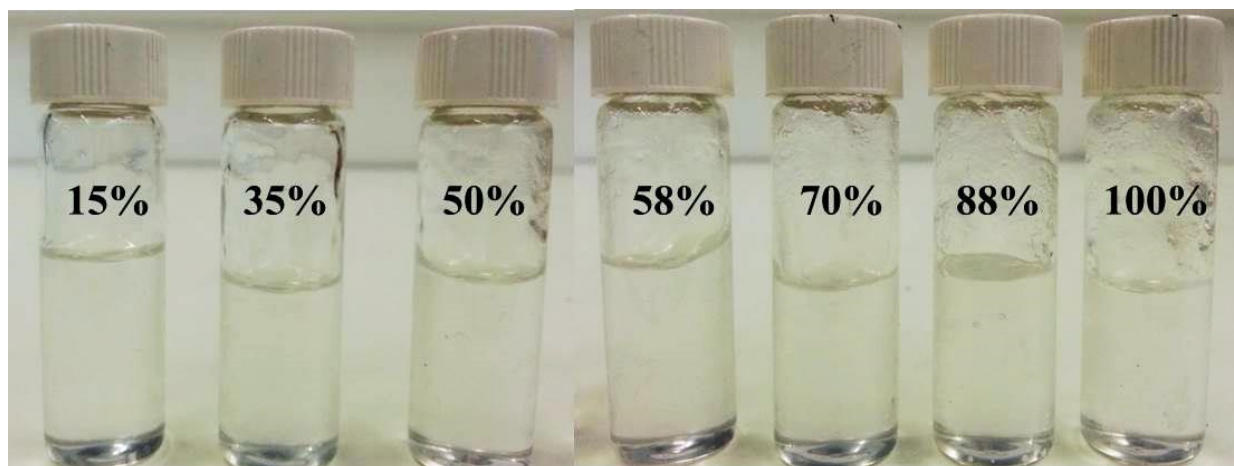

**Figure S2.** Photos of vessels containing 30 mg/mL silica nanoparticles in cyclohexane with different %SiOH.

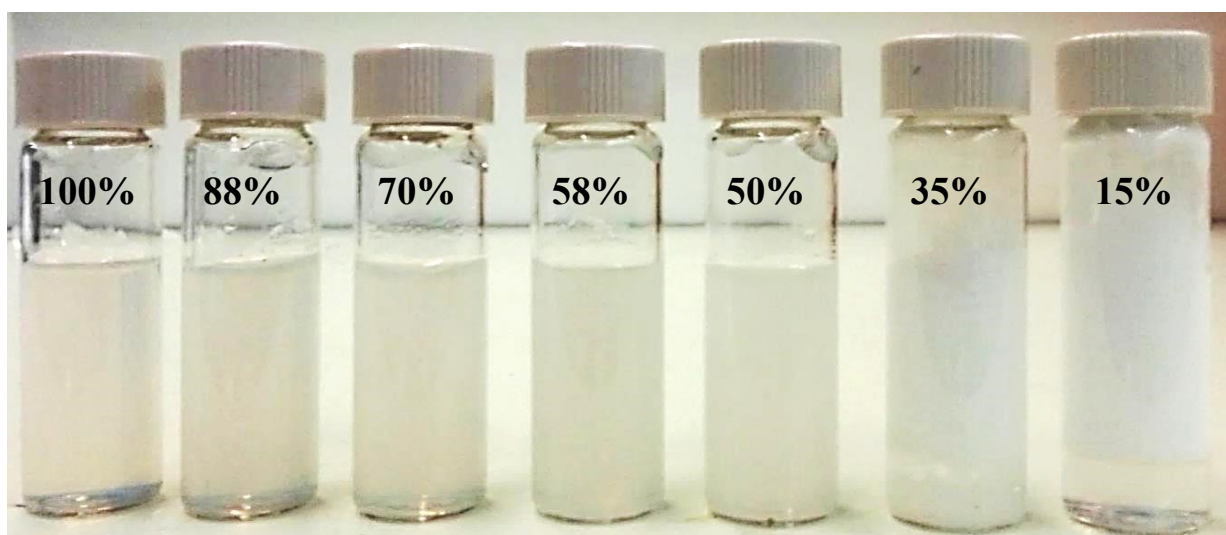

**Figure S3.** Photos of vessels containing 30 mg/mL silica nanoparticles with different % SiOH in water. Stable dispersions are formed from 100% to 50% SiOH groups on silica nanoparticles.

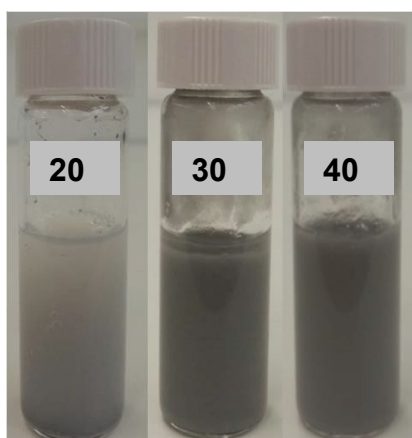

**Figure S4.** Photos of eutectic capsules in water containing 20 mg/mL GaIn alloy and different concentrations of 50% SiOH-modified silica nanoparticles (in mg/mL) after 8 days.

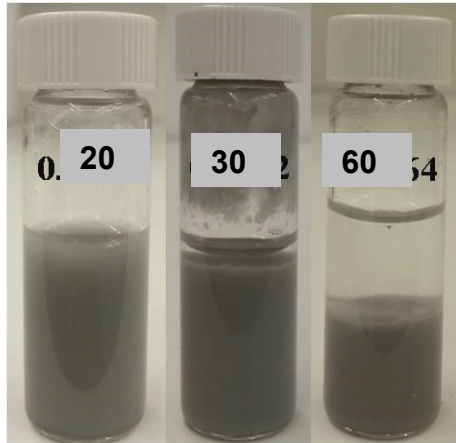

**Figure S5.** Photos of eutectic capsules in water containing different concentration of GaIn alloy (in mg/mL) and 30 mg/mL of 50% SiOH silica particles after 8 days.

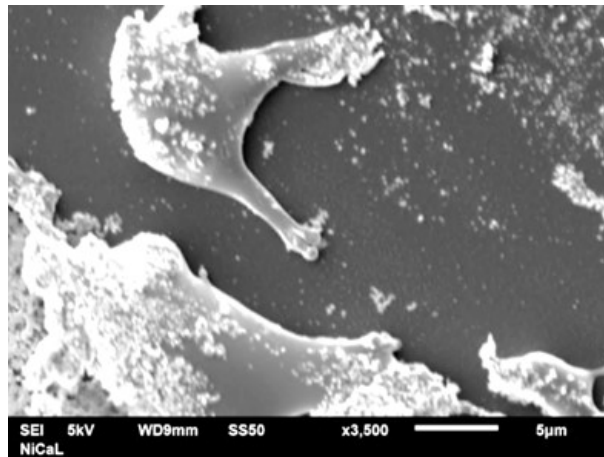

**Figure S6.** SEM of damaged eutectic capsules showing the liquid nature of the inner encapsulate core.

**Table S1.** The weight changes of Al/Mg alloy sample (2cm<sup>2</sup> surface and 0.3 cm thickness) with incorporated GaIn eutectic capsules during thermal cycling

| Al/Mg alloy + GaIn capsules | Weight | % of weight changes |
|-----------------------------|--------|---------------------|
| Initial sample              | 1.64 g | 0                   |
| 1 <sup>st</sup> cycle       | 1.63 g | -0.6                |
| 5 <sup>th</sup> cycle       | 1.63 g | -0.6                |
| 10 <sup>th</sup> cycle      | 1.64   | 0                   |
| 50 <sup>th</sup> cycle      | 1.63   | -0.6                |
